# Supplementary material for: Functional lesional neurosurgery for tremor—a protocol for a systematic review and meta-analysis
Source: PubMed Central journal article supplement — BMJ Open. 2017 May 9;7(5):e015409. doi: 10.1136/bmjopen-2016-015409 (PMC5623440; doi:10.1136/bmjopen-2016-015409), 2017-05-09
Supplement: bmjopen-2016-015409.draft_revisions.pdf [file bmjopen-2016-015409.draft_revisions.pdf]

# BMJ Open

## Functional lesional neurosurgery for tremor – a protocol for a systematic review and meta-analysis

|                                 |                                                                                                                                                                                                                                                                                                                                                                                          |
|---------------------------------|------------------------------------------------------------------------------------------------------------------------------------------------------------------------------------------------------------------------------------------------------------------------------------------------------------------------------------------------------------------------------------------|
| Journal:                        | <i>BMJ Open</i>                                                                                                                                                                                                                                                                                                                                                                          |
| Manuscript ID                   | bmjopen-2016-015409                                                                                                                                                                                                                                                                                                                                                                      |
| Article Type:                   | Protocol                                                                                                                                                                                                                                                                                                                                                                                 |
| Date Submitted by the Author:   | 05-Dec-2016                                                                                                                                                                                                                                                                                                                                                                              |
| Complete List of Authors:       | Schreglmann, Sebastian; University College London, Institute of Neurology<br>Krauss, Joachim; Medizinische Hochschule Hannover, Department of Neurosurgery<br>Chang, Jin Woo; Yonsei University College of Medicine, Department of Neurosurgery<br>Bhatia, Kailash; University College London, Institute of Neurology<br>Kaegi, Georg; Kantonsspital St. Gallen, Department of Neurology |
| <b>Primary Subject Heading</b>: | Neurology                                                                                                                                                                                                                                                                                                                                                                                |
| Secondary Subject Heading:      | Neurology                                                                                                                                                                                                                                                                                                                                                                                |
| Keywords:                       | Adult neurology < NEUROLOGY, Parkinson-s disease < NEUROLOGY, NEUROSURGERY, Neurosurgery < SURGERY                                                                                                                                                                                                                                                                                       |
|                                 |                                                                                                                                                                                                                                                                                                                                                                                          |

SCHOLARONE™  
Manuscripts

Peer review only

1  
2  
3 1 **Functional lesional neurosurgery for tremor – a protocol for a systematic review and meta-analysis**  
4  
5 2

6 3 Sebastian R. Schreglmann, MD <sup>1,2</sup>; Joachim K. Krauss, MD <sup>3</sup>; Jin Woo Chang, MD, PhD <sup>4</sup>; Kailash P. Bhatia,  
7  
8 4 MD, FRCP <sup>1</sup>; Georg Kägi, MD <sup>2</sup>  
9  
10 5

11  
12 6 <sup>1</sup>Department of Motor Neuroscience and Movement Disorders, Institute of Neurology, UCL, 33 Queen Square,  
13  
14 7 London WC1N 3BG, UK

15  
16 8 <sup>2</sup> Department of Neurology, Kantonsspital St.Gallen, Rorschacher Strasse 95, 9007 St.Gallen, Switzerland  
17  
18 9 Sobell

19  
20 10 <sup>3</sup>Department of Neurosurgery, Medizinische Hochschule Hannover, Carl-Neuberg-Strasse 1, 30625 Hannover,  
21  
22 11 Germany

23  
24 12 <sup>4</sup>Department of Neurosurgery, Yonsei University College of Medicine, 205 Seongsanno, Seodaemun-gu Seoul  
25  
26 13 120–752, Republic of Korea  
27  
28 14

29  
30 15  
31  
32 16  
33 17 Corresponding Author:

34  
35 18 Sebastian R. Schreglmann, MD

36  
37 19 Sobell Department of Motor Neuroscience and Movement Disorders

38  
39 20 University College London (UCL)

40  
41 21 Institute of Neurology, London, United Kingdom

42  
43 22 tel: +44(0)20 344 88604

44  
45 23 fax: +44(0)20 344 88642

46  
47 24 email: skgtsrs@ucl.ac.uk  
48  
49 25  
50 26

51  
52 27 word count abstract: 295 / 300

53  
54 28 word count text: 1875 / 4000

55  
56 29 running title: tremor neurosurgery

57  
58 30 Funding sources: none  
59  
60 31

1  
2  
3 32  
4  
5 33  
6  
7 34  
8  
9 35  
10  
11 36  
12  
13 37  
14  
15 38  
16  
17 39  
18  
19 40  
20  
21 41  
22  
23 42  
24  
25 43  
26  
27 44  
28  
29 45  
30  
31 46  
32  
33 47  
34  
35 48  
36  
37 49  
38  
39 50  
40  
41 51  
42  
43 52  
44  
45 53  
46  
47 54  
48  
49 55  
50  
51 56  
52  
53 57  
54  
55 58  
56  
57 59  
58  
59 60  
60

## Abstract

**Introduction:** The recent introduction of incision-less lesional neurosurgery using Gamma knife and MRI-guided focused ultrasound has revived interest in lesional treatment options for tremor disorders. Preliminary literature researches reveal that the consistency of treatment effects after lesional neurosurgery for tremor has not formally been assessed yet. Similarly, the efficacy of different targets for lesional treatment and incidence of persistent side effects of lesional neurosurgical interventions has not been comprehensively assessed. This work therefore aims to describe a suitable process how to review the existing literature on efficacy and persistent side effects of lesional neurosurgical treatment for tremor due to Parkinson's disease (PD), Essential Tremor (ET), Multiple Sclerosis (MS) and midbrain / rubral tremor.

**Methods and Analysis:** We will search electronic databases (Medline, Cochrane) and reference lists of included articles for studies reporting lesional interventions for tremor in cohorts homogeneous for tremor aetiology and intervention (technique and target). We will include cohorts with a minimum number of five subjects and follow-up of two months. One investigator will perform the initial literature search and two investigators will then independently decide which references to include for final efficacy and safety analysis. After settling of disagreement, data will be extracted from articles using a standardized template. We will perform a random-effect meta-analysis calculating standardized mean differences (Hedge's  $g$ ) for comparison in Forest plots and subgroup analysis after assessment of heterogeneity using  $I^2$  statistics.

**Ethics and Dissemination:** This study will summarize the available evidence on the efficacy of lesional interventions for the most frequent tremor disorders, as well as for the incidence rate of persisting side effects after unilateral lesional treatment. This data will be useful to guide future work on incision-less lesional interventions for tremor.

**Systematic review registration:** This study has been registered with the PROSPERO database (no. CRD42016048049).

**Keywords:** Tremor, Lesional neurosurgery, Thalamotomy, Subthalamotomy, Pallidotomy, Radiofrequency ablation, Focused ultrasound, Gamma knife

1  
2  
3 63  
4  
5 64  
6  
7 65  
8  
9 66  
10  
11 67  
12  
13 68  
14  
15 69  
16  
17 70  
18  
19 71  
20  
21 72  
22  
23 73  
24  
25 74  
26  
27 75  
28  
29 76  
30  
31 77  
32  
33 78  
34  
35 79  
36  
37 80  
38  
39 81  
40  
41 82  
42  
43 83  
44  
45 84  
46  
47 85  
48  
49 86  
50  
51 87  
52  
53 88  
54  
55 89  
56  
57 90  
58  
59 91  
60

Strengths and Limitations of this study:

- Protocol for first formal, systematic review and meta-analysis of lesional functional neurosurgery for tremor
- Comprehensive comparison of consistency and efficacy of lesional targets in most prevalent tremor aetiologies
- First meta-analysis of persistent side effect prevalence after lesional neurosurgical treatment
- Protocol to establish safety and efficacy benchmarks for emerging incision-less lesional functional neurosurgery approaches
- Frequent retrospective nature and potential reporting bias of primary source data will be addressed

94

95 **Main text**

96

97 **INTRODUCTION:**

98 Tremor is defined as an involuntary, oscillating sinusoidal movement of a body part and is a frequent symptom  
99 in Parkinson's disease (PD), Essential Tremor (ET), but also in Multiple Sclerosis (MS) or after midbrain  
100 lesions. ET is one of the most common movement disorders affecting up to 4.6% of the population  $\geq 65$  years  
101 [1]. While most patients do well with first line oral medication like betablockers or Primidone, at least 50% of  
102 them do not tolerate this long term [2], leaving 10% severely disabled by their tremor, losing dexterity to a  
103 great extent [3]. Similarly in PD, tremor is one of the most challenging symptoms to treat with oral medication  
104 [4] and this group of severely incapacitated patients depends on advanced therapeutic options [5].

105 Although it's phenomenology considerably differs between the above mentioned aetiologies, our current  
106 understanding points at a common abnormal central oscillatory activity within a network involving motor cortex,  
107 thalamus, globus pallidum and cerebellum [6-8]. Accordingly, lesional surgical interventions within parts of this  
108 network using functional neurosurgery have been utilized successfully since the 1940ies [9]. Over time,  
109 interventions at various anatomical structures within this network have been studied [9-12] and it is now  
110 generally accepted that thalamotomy, influencing afferent cerebellar signalling, provides the highest level of  
111 tremor symptom relief.

112 During the past two decades lesional interventions, although performed world-wide [13], were largely  
113 superseded in the academic setting by stimulation technology [14], which contributed dramatically to our  
114 understanding of tremor pathoetiology [15-18]. Since the introduction of Gamma Knife (GK), incision-less  
115 functional neurosurgery, i.e. lesion placement through the intact skull, is a possibility [12] and the recent  
116 addition of MRI-guided high-intensity focused ultrasound (MRIgFUS) [19-22] has again stimulated interest in  
117 this field [23,24].

118 A preliminary literature search performed in June 2016 suggests a wealth of studies on this topic, although the  
119 majority of published reports are of small or medium size. Obvious heterogeneity in study design, data collection,  
120 documentation and presentation limit the accessibility of this data and complicate it's interpretation. So far, there  
121 are no reliable estimates on the consistency of treatment effects after lesional interventions for tremor. Similarly,  
122 the prevalence of persisting side effects after such interventions has not been compared in a comprehensive way.  
123 We therefore aim to summarize the available data on lesional functional surgery for tremor disorders to allow

1  
2  
3 124 comparisons between aetiologies, treatment targets and techniques. The limitations of earlier reports with  
4  
5 125 regards to established and recognized diagnostic criteria, use of validated clinical assessment tools and  
6  
7 126 electrophysiological or imaging-based target verification [10] led us to restrict the literature search to a  
8  
9 127 publication date from 1990 onwards.

10  
11 128 We specifically aim to answer the following questions:

12  
13  
14 129 What is the efficacy of lesional neurosurgical interventions on tremor severity in tremor due to PD, ET, MS and  
15  
16 130 midbrain/rubral origin for different lesioning techniques and targets according to published, peer-reviewed  
17  
18 131 studies?

19  
20  
21 132 What is the prevalence rate of persistent side effects after unilateral lesional interventions for different lesioning  
22  
23 133 technique and target according to published, peer-reviewed studies?

24  
25 134 This will not only allow to objectively assess the safety and efficacy of existing lesional tremor treatment  
26  
27 135 approaches but also to compare novel, incision-less lesional interventions with this benchmark.

28  
29  
30 136

31  
32  
33 137 **METHODS AND ANALYSIS:**

34  
35 138

36 139 **Protocol**

37  
38 140 The methods for this systematic review have been developed according to the recommendations from the  
39  
40 141 Preferred Reporting Items for Systematic Review and Meta-Analysis Protocols (PRISMA-P) 2015 statement  
41  
42 142 [25]. This systematic review protocol has been registered in the International Prospective Register of Systematic  
43  
44 143 reviews (PROSPERO) on September 20<sup>th</sup> 2016: CRD42016048049. A PRISMA-P file is attached (see  
45  
46 144 Additional file 1).

47  
48 145 Eligibility criteria

49  
50  
51 146 Cohorts reporting a minimum of five patients of or above the age of 18 years with a tremor diagnosis of  
52  
53 147 confirmed aetiology, subjected to uni- or bilateral lesional functional neurosurgery in a central neuroanatomical  
54  
55 148 structure (thalamus, pallidum, subthalamic nucleus, alternative subcortical targets) by means of an intracerebral  
56  
57 149 lesion, either by incisional (placement of a stylette, leukotome, cryosurgery or radiofrequency (RF) probe after  
58  
59 150 skull opening) or incision-less (MRIGFUS, GK) means. Cases that received lesional functional neurosurgery in  
60

1  
2  
3 151 more than one anatomical structure at the same time or non-lesional approaches including deep brain stimulation  
4  
5 152 (DBS) will be excluded.  
6

7 153 Outcome Measures:

8  
9 154 As we expect only limited amount of data from controlled trials to be found, this protocol aims to assess  
10  
11 155 intervention effects by comparing pre- and post-interventional states. Primary outcome measure will be the  
12  
13 156 change in upper limb tremor severity from baseline to follow-up time points, as reported on a validated tremor  
14  
15 157 rating scale (United Parkinson's disease rating scale, part III (UPDRS III), clinical rating scale for tremor (CRST  
16  
17 158 [26,27]), Whiget tremor scale etc.). Results from controlled trials comparing lesional interventions to alternative  
18  
19 159 interventions, such as e.g. best medical treatment or deep brain stimulation will be included and discussed in a  
20  
21 160 narrative way as far as meaningful for comparison to lesional interventions. As we expect the literature to be  
22  
23 161 heterogeneous in terms of follow-up duration and applied tremor rating scales we aim to primarily summarize  
24  
25 162 the outcome as standardized mean difference (Hedge's g) [28] irrespective of follow-up duration. To limit bias  
26  
27 163 we will chose the follow-up time-point with the largest number of patients retained in the analysis.  
28  
29 164 Homogeneous cohorts (same tremor aetiology, intervention target and technique) will be grouped together for  
30  
31 165 subgroup-analysis if they consist of a minimum of n=2.

32 166 Secondary outcome measure will be the frequency of reported persistent side-effects after unilateral lesions per  
33  
34 167 indication and intervention group, calculated as % of cases per group. In addition, we aim to calculate the mean  
35  
36 168 rate of dysarthria and gait difficulties reported for unilateral vs. bilateral procedures. Homogeneous cohorts  
37  
38 169 (tremor aetiology, intervention target and technique) will be grouped together for analysis if they consist of a  
39  
40 170 minimum of n=2.

41 171

42 172 Study design:

43  
44 173 The choice of inclusion/exclusion criteria reflects that we expect very few randomized trials in this field.  
45  
46 174 Inclusion: Randomized controlled trials (RCTs), Meta-Analysis, case-control, prospective and retrospective case  
47  
48 175 series. Exclusion: Studies reporting results from mixed aetiologies (subjects of different aetiologies grouped  
49  
50 176 together) or mixed interventions (different anatomical targets grouped together). We will include peer-reviewed  
51  
52 177 articles without language restriction. Letters, abstracts and editorials will not be included (see Table 1).  
53

54 178

55 179 Information sources and search strategy:

56  
57 180 A full search of MEDLINE and Cochrane (ovid) database will be performed limited to time of publication  
58  
59 181 (between January 1990 and September 2016), using "tremor\*" AND "lesion\*", "neurosurg\*", "thalamotomy",  
60

1  
2  
3  
4  
5  
6  
7  
8  
9  
10  
11  
12  
13  
14  
15  
16  
17  
18  
19  
20  
21  
22  
23  
24  
25  
26  
27  
28  
29  
30  
31  
32  
33  
34  
35  
36  
37  
38  
39  
40  
41  
42  
43  
44  
45  
46  
47  
48  
49  
50  
51  
52  
53  
54  
55  
56  
57  
58  
59  
60

182 “subthalamotomy”, “pallidotomy” as search terms. Contact with authors will be made if needed.

For peer review only



183 Table 1. Planned In- and Exclusion criteria

|                     | Inclusion criteria                                                                                                                                                                                                                                                                                                                                                                                                                                                                                                | Exclusion criteria                                                                                                                                                                                                           |
|---------------------|-------------------------------------------------------------------------------------------------------------------------------------------------------------------------------------------------------------------------------------------------------------------------------------------------------------------------------------------------------------------------------------------------------------------------------------------------------------------------------------------------------------------|------------------------------------------------------------------------------------------------------------------------------------------------------------------------------------------------------------------------------|
| Population          | <ul style="list-style-type: none"> <li>- Adult patients (&gt;18yrs.) with a tremor diagnosis of confirmed aetiology</li> <li>- uni- or bilateral lesional functional neurosurgical intervention in a central neuroanatomical structure</li> <li>- by incisional (placement of a stylette, leukotome, cryosurgery or radiofrequency probe after skull opening) or incision-less (transcranially focused ultrasound (MRI-guided focused ultrasound (MRIgFUS)), radiation energy (Gamma Knife (GK)) means</li> </ul> | <ul style="list-style-type: none"> <li>- cases subjected to lesional functional neurosurgery in more than one anatomical structure at the same time</li> <li>- or stimulation techniques (deep brain stimulation)</li> </ul> |
| Study design        | <ul style="list-style-type: none"> <li>- randomized controlled trials (RCTs), Meta-Analysis, case-control, prospective and retrospective case series</li> <li>- a minimum of five subjects included per cohort (indication / treatment)</li> <li>- minimum follow-up of 2 months after the intervention</li> </ul>                                                                                                                                                                                                | <ul style="list-style-type: none"> <li>- studies reporting results from mixed aetiologies or mixed intervention (different anatomical targets or techniques)</li> </ul>                                                      |
| Efficacy Outcome    | <ul style="list-style-type: none"> <li>- reporting tremor outcome on a validated tremor scale</li> </ul>                                                                                                                                                                                                                                                                                                                                                                                                          |                                                                                                                                                                                                                              |
| Safety Outcome      | <ul style="list-style-type: none"> <li>- side effects after unilateral only interventions</li> </ul>                                                                                                                                                                                                                                                                                                                                                                                                              | <ul style="list-style-type: none"> <li>- cohorts including bilateral interventions</li> </ul>                                                                                                                                |
| Type of publication | <ul style="list-style-type: none"> <li>- Peer-reviewed articles without language restriction</li> </ul>                                                                                                                                                                                                                                                                                                                                                                                                           | <ul style="list-style-type: none"> <li>- Letters, abstracts and editorials</li> </ul>                                                                                                                                        |

1  
2  
3 184 Data collection:

4 185 Primary database searches will be performed by one researcher who will compile a list of non-duplicate studies  
5  
6 186 according to in- and exclusion criteria. In addition to the primary searches we will identify relevant studies from  
7  
8 187 the reference lists of primary search results. From this list, two researchers will independently compile a  
9  
10 188 definitive list of studies to be included in the safety and efficacy analysis – before analysis, lists will be  
11  
12 189 compared and discrepancies settled. Data will be extracted from original sources by use of a standardized  
13  
14 190 template. As we aim to cover publications from the past 26 years, which might cover interventions dating back  
15  
16 191 to >35 years we deem it unrealistic to compile data on individual participant basis, unless given in publications.  
17

18 192

19 193 Data Items:

- 20 194
- 21 195 1. Publication details: title, authors, publication year
  - 22 196 2. Design: pro- retrospective, randomization, blind-assessment, controlled;
  - 23 197 3. Clinical details: cohort size, anatomical target, treatment technique, uni- or bilateral intervention,  
24 198 guidance/targeting technique, tremor scale and item used, pre- and postinterventional tremor score  
25 199 (mean  $\pm$  standard deviation), follow-up duration, art / number and severity of transient and persistent  
26 200 side-effects reported;

27 201 Quality assessment according to Jadad [29] and Newcastle Ottawa scale[30];

28 202

29 203 Bias assessment:

30 204 If several follow-up time points are reported per cohort, the time-point with the largest number of subjects  
31 205 retained will be chosen to minimize selection/reporting bias. We will assess the quality of RCTs (Jadad scale  
32 206 [29]) and non-randomized trials (Newcastle-Ottawa Scale [30]) by means of standardized assessment tools and  
33 207 will discuss the limitations of the data synthesis in terms of study and data quality. In addition to that, in the  
34 208 discussion of results - depending on the overall quality of data – we will discuss potential shortcomings of our  
35 209 source data, as retrospective analyses with incomplete follow-up tend to introduce bias.

36 210 A formal assessment of publication bias however only makes sense in the presence of a sufficient number (>10)  
37 211 of homogeneous data sets [31]. As we expect the data compiled in this analysis to be of limited homogeneity we  
38 212 do not plan to formally calculate bias assessments such as by means of Funnel plots, as this can result in  
39 213 misleading results in small and heterogeneous data sets [31]. This shall only be calculated in case subgroups with  
40 214 more than 10 studies included are shown to have no substantial level of heterogeneity ( $I^2 < 50\%$ ).

41 215

1  
2  
3 215 Data synthesis and statistics:  
4  
5 216 Aggregate data on pre-/post-interventional tremor severity will be extracted from publications or calculated from  
6  
7 217 them in the form of mean  $\pm$  standard deviation for outcome variables per indication/intervention group per  
8  
9 218 publication. Data for continuous outcome measures will be used to calculate standardized mean difference  
10  
11 219 (Hedge's  $g$ ) values including 95% confidence intervals [28] and to compute Forest plots using the Meta-  
12  
13 220 Essentials workbook4 toolbox [32]. Based on study heterogeneity we will use a random-effects meta-analysis for  
14  
15 221 quantitative comparison. Heterogeneity between studies will be assessed using  $I^2$  statistics, with an  $I^2 >50\%$   
16  
17 222 regarded as an indicator of substantial heterogeneity.

18  
19 223 As we will analyse data from different tremor aetiologies and interventions, we will undertake subgroup analyses  
20  
21 224 by the following subgroups: PD tremor: RF ablation ventral intermedial (V.im.) nucleus, RF ablation Globus  
22  
23 225 pallidus internus (GPi), RF ablation subthalamic nucleus (STN), GK ablation V.im.; ET tremor: RF ablation  
24  
25 226 V.im., GK ablation V.im., MRIGFUS ablation V.im. MS tremor: RF ablation V.im., GK ablation V.im. Formal  
26  
27 227 subgroup analysis will be done in case of groups of a minimum of 2 studies per study intervention, target and  
28  
29 228 aetiology.

30  
31 229 We will provide a narrative synthesis of results structured by aetiological category and intervention type and also  
32  
33 230 discuss the influence of study design and follow-up, taking GRADE guidelines into consideration [33].  
34  
35 231

36 232

37 233

### 234 **ETHICS AND DISSEMINATION:**

38  
39 234 The aim of this systematic review and meta-analysis is to summarize the data on consistency and efficacy of  
40  
41 235 lesional functional neurosurgical interventions for the treatment of tremor disorders. The recent development of  
42  
43 236 incision-less lesional functional neurosurgery techniques warrants this careful reassessment of the existing  
44  
45 237 literature to guide future research into lesional interventions. Ethically, we consider it an obligation to  
46  
47 238 summarize this data in a systematic manner to optimize treatment outcome for future patients. It will provide the  
48  
49 239 basis to compare the efficacy of lesional interventions across anatomical targets, tremor aetiologies and lesional  
50  
51 240 techniques. Furthermore, the calculation of prevalence rates of persistent side-effects after unilateral lesional  
52  
53 241 interventions will allow for safety comparisons of established, incisional lesioning techniques and novel  
54  
55 242 incision-less procedures, such as MRIGFUS and Gamma knife. This will allow a more unbiased evaluation of the  
56  
57 243 effects of bilateral interventions of the past and possible future.

58  
59 244 We are committed to publish the results of this study in a peer-reviewed journal to distribute the outcome of this  
60  
245 work. To maximise data transparency, we aim to include the data extracted from published sources in our final

1  
2  
3 246 publication in the form of a table. This protocol, as well as its registration and publication with the PROSPERO  
4 247 database (no. CRD42016048049) documents our continuing efforts of transparent research.

5  
6 248

7  
8 249

9  
10 250 **List of abbreviations:**

11 251 Clinical rating scale for tremor (CRST), deep brain stimulation (DBS), Essential Tremor (ET), Gamma knife  
12 252 (GK), Globus pallidus internus (GPI), MRI-guided high-intensity focused ultrasound (MRIgFUS) Parkinson's  
13 253 disease (PD), Multiple Sclerosis (MS), Preferred Reporting Items for Systematic Review and Meta-Analysis  
14 254 Protocols (PRISMA-P), Randomized controlled trials (RCTs), subthalamic nucleus (STN), United Parkinson's  
15 255 disease rating scale, part III (UPDRS III), ventral intermedial (V.im.) nucleus,

16 256

17 257 **Declarations:**

18 258 Ethics approval: not applicable

19 259

20 260 Data sharing statement: not applicable – research protocol only

21 261

22 262 Competing interest: The authors declare that they have no competing interests.

23 263

24 264 Funding: This research received no specific grant from any funding agency in the public,  
25 265 commercial or not-for-profit sectors.

26 266

27 267 Author's contribution: SRS initialized and conceptualised the research plan for the proposed systematic  
28 268 review and wrote the first manuscript draft. KB provided critical input on the proposed methodology and  
29 269 statistical analysis and reviewed the manuscript for important intellectual content. JKK and JWC reviewed the  
30 270 methodology and reviewed the manuscript for important intellectual content. GK supervised the project and  
31 271 corrected the manuscript for important intellectual content. All authors approved of the final version of the  
32 272 manuscript.

33 273

34 274 Acknowledgements: SRS is supported by grants by the Swiss Science Foundation, the Swiss Neurological  
35 275 Society and the European Academy of Neurology. We would like to thank Ashwani Jha for many helpful  
36 276 discussions on the statistical analysis.

277 **References:**

278

- 279 1 Louis ED, Ferreira JJ. How common is the most common adult movement disorder? Update on  
280 the worldwide prevalence of essential tremor. *Mov Disord* 2010;**25**:534–41.  
281 doi:10.1002/mds.22838
- 282 2 Lyons KE, Pahwa R. Pharmacotherapy of essential tremor : an overview of existing and  
283 upcoming agents. *CNS Drugs* 2008;**22**:1037–45. doi:10.2165/0023210-200822120-00006
- 284 3 Deuschl G, Raethjen J, Hellriegel H, *et al.* Treatment of patients with essential tremor. *The Lancet  
285 Neurology* 2011;**10**:148–61. doi:10.1016/S1474-4422(10)70322-7
- 286 4 Speelman JD, Schuurman R, de Bie RMA, *et al.* Stereotactic neurosurgery for tremor. *Mov  
287 Disord* 2002;**17 Suppl 3**:S84–8. doi:10.1002/mds
- 288 5 Pahwa R, Lyons KE. Essential tremor: differential diagnosis and current therapy. *Am J Med  
289* 2003;**115**:134–42. doi:10.1016/S0002-9343(03)00259-6
- 290 6 Raethjen J, Muthuraman M. Cause or compensation? Complex changes in cerebello-thalamo-  
291 cortical networks in pathological action tremor. *Brain* 2015;**138**:2808–10.  
292 doi:10.1093/brain/awv238
- 293 7 Helmich RC, Janssen MJR, Oyen WJG, *et al.* Pallidal dysfunction drives a cerebellothalamic  
294 circuit into Parkinson tremor. *Ann Neurol* 2011;**69**:269–81. doi:10.1002/ana.22361
- 295 8 Cagnan H, Little S, Foltynie T, *et al.* The nature of tremor circuits in parkinsonian and essential  
296 tremor. *Brain* 2014;**137**:3223–34. doi:10.1093/brain/awu250
- 297 9 Gildenberg PL, Krauss JK. 4 A-01 History of Stereotactic Surgery. In: *Textbook of stereotactic  
298 and functional Neurosurgery*. J. Springer 2008. 1–32.
- 299 10 Guridi J, Lozano AM. A brief history of pallidotomy. *Neurosurgery* 1997;**41**:1169–80–  
300 discussion1180–3.
- 301 11 Higuchi Y, Matsuda S, Serizawa T. Gamma knife radiosurgery in movement disorders:  
302 Indications and limitations. *Mov Disord* 2016;:n/a–n/a. doi:10.1002/mds.26625
- 303 12 Campbell AM, Glover J, Chiang VLS, *et al.* Gamma knife stereotactic radiosurgical thalamotomy  
304 for intractable tremor: A systematic review of the literature. *Radiotherapy and Oncology*  
305 2015;**114**:296–301. doi:10.1016/j.radonc.2015.01.013
- 306 13 Jourdain VA, Schechtman G. Health economics and surgical treatment for Parkinson's disease in  
307 a world perspective: results from an international survey. *Stereotact Funct Neurosurg*  
308 2014;**92**:71–9. doi:10.1159/000355215
- 309 14 Benabid AL, Chabardes S, Mitrofanis J, *et al.* Deep brain stimulation of the subthalamic nucleus  
310 for the treatment of Parkinson's disease. *The Lancet Neurology* 2009;**8**:67–81.  
311 doi:10.1016/S1474-4422(08)70291-6
- 312 15 Kitagawa M, Murata J, Kikuchi S, *et al.* Deep brain stimulation of subthalamic area for severe  
313 proximal tremor. *Neurology* 2000;**55**:114–6.
- 314 16 Herzog J, Hamel W, Wenzelburger R, *et al.* Kinematic analysis of thalamic versus subthalamic  
315 neurostimulation in postural and intention tremor. *Brain* 2007;**130**:1608–25.  
316 doi:10.1093/brain/awm077
- 317 17 Pahwa R, Lyons KE, Wilkinson SB, *et al.* Comparison of thalamotomy to deep brain stimulation  
318 of the thalamus in essential tremor. *Mov Disord* 2001;**16**:140–3.

- 1  
2  
3 319 18 Cagnan H, Brittain J-S, Little S, *et al.* Phase dependent modulation of tremor amplitude in  
4 320 essential tremor through thalamic stimulation. *Brain* 2013;**136**:3062–75.  
5 321 doi:10.1093/brain/awt239
- 6 322 19 Martin E, Jeanmonod D, Morel A, *et al.* High-intensity focused ultrasound for noninvasive  
7 323 functional neurosurgery. *Ann Neurol* 2009;**66**:858–61. doi:10.1002/ana.21801
- 8  
9 324 20 Lipsman N, Schwartz ML, Huang Y, *et al.* MR-guided focused ultrasound thalamotomy for  
10 325 essential tremor: a proof-of-concept study. *The Lancet Neurology* 2013;**12**:462–8.  
11 326 doi:10.1016/S1474-4422(13)70048-6
- 12  
13 327 21 Elias JW, Huss D, Voss T, *et al.* A pilot study of focused ultrasound thalamotomy for essential  
14 328 tremor. *N Engl J Med* 2013;**369**:640–8. doi:10.1056/NEJMoa1300962
- 15  
16 329 22 Chang WS, Jung HH, Kweon EJ, *et al.* Unilateral magnetic resonance guided focused ultrasound  
17 330 thalamotomy for essential tremor: practices and clinicoradiological outcomes. *J Neurol*  
18 331 *Neurosurg Psychiatr* 2015;**86**:257–64. doi:10.1136/jnnp-2014-307642
- 19  
20 332 23 Hariz M. Focused ultrasound thalamotomy improves essential tremor. *Mov Disord* 2013;**28**:1803.  
21 333 doi:10.1002/mds.25695
- 22  
23 334 24 Deuschl G. New hope for severe essential tremor? *The Lancet Neurology* 2013;**12**:420–2.  
24 335 doi:10.1016/S1474-4422(13)70062-0
- 25  
26 336 25 Shamseer L, Moher D, Clarke M, *et al.* Preferred reporting items for systematic review and meta-  
27 337 analysis protocols (PRISMA-P) 2015: elaboration and explanation. *BMJ* 2015;**349**:g7647.  
28 338 doi:10.1136/bmj.g7647
- 29  
30 339 26 Fahn S, Tolosa E, Marin C. Clinical rating scale for tremor. In: Jankovic J, Tolosa E, eds.  
31 340 *Parkinsons Disease and Movement Disorders*. Munich: 1988. 225–34.
- 32  
33 341 27 Stacy MA, Elble RJ, Ondo WG, *et al.* Assessment of interrater and intrarater reliability of the  
34 342 Fahn-Tolosa-Marin Tremor Rating Scale in essential tremor. *Mov Disord* 2007;**22**:833–8.  
35 343 doi:10.1002/mds.21412
- 36  
37 344 28 Higgins J, Green S, editors. The Cochrane Handbook for Systematic Reviews of Interventions. In:  
38 345 *Cochrane Handbook for Systematic Reviews of Interventions*. 2011. www.handbook.cochrane.org
- 39  
40 346 29 Jadad AR, Moore RA, Carroll D. Assessing the quality of reports of randomized clinical trials: is  
41 347 blinding necessary? *Control Clin Trials* 1996;:1–12.
- 42  
43 348 30 Wells G, Shea B, OConnell D. The Newcastle-Ottawa Scale (NOS) for assessing the quality of  
44 349 nonrandomized studies in meta-analyses. [http://www.ohri.ca/](http://www.ohri.ca/programs/clinical_epidemiology/oxford.asp)  
45 350 [programs/clinical\\_epidemiology/oxford.asp](http://www.ohri.ca/programs/clinical_epidemiology/oxford.asp) .
- 46  
47 351 31 Lau J, Ioannidis JPA, Terrin N, *et al.* The case of the misleading funnel plot. *BMJ* 2006;**333**:597–  
48 352 600. doi:10.1136/bmj.333.7568.597
- 49  
50 353 32 van Rhee HJ, Suurmond R, Hak T. User manual for Meta-Essentials: Workbooks for meta-  
51 354 analysis (Version 1.0). [www.erim.eur.nl/research-support/meta-essentials](http://www.erim.eur.nl/research-support/meta-essentials). 2015.
- 52  
53 355 33 Guyatt GH, Oxman AD, Montori V, *et al.* GRADE guidelines: 5. Rating the quality of evidence--  
54 356 publication bias. *J Clin Epidemiol* 2011;**64**:1277–82. doi:10.1016/j.jclinepi.2011.01.011
- 55  
56 357

Supplement to “Functional lesional neurosurgery for tremor - a protocol for a systematic review and meta-analysis” Schreglmann et al.

PRISMA-P (Preferred Reporting Items for Systematic review and Meta-Analysis Protocols) 2015 checklist: recommended items to address in a systematic review protocol\*

| Section and topic                 | Item No | Checklist item                                                                                                                                                                                  | Reported     |
|-----------------------------------|---------|-------------------------------------------------------------------------------------------------------------------------------------------------------------------------------------------------|--------------|
| <b>ADMINISTRATIVE INFORMATION</b> |         |                                                                                                                                                                                                 |              |
| Title:                            |         |                                                                                                                                                                                                 |              |
| Identification                    | 1a      | Identify the report as a protocol of a systematic review                                                                                                                                        | Title page   |
| Update                            | 1b      | If the protocol is for an update of a previous systematic review, identify as such                                                                                                              | N/A          |
| Registration                      | 2       | If registered, provide the name of the registry (such as PROSPERO) and registration number                                                                                                      | Page 2 and 4 |
| Authors:                          |         |                                                                                                                                                                                                 |              |
| Contact                           | 3a      | Provide name, institutional affiliation, e-mail address of all protocol authors; provide physical mailing address of corresponding author                                                       | Title page   |
| Contributions                     | 3b      | Describe contributions of protocol authors and identify the guarantor of the review                                                                                                             | Page 8       |
| Amendments                        | 4       | If the protocol represents an amendment of a previously completed or published protocol, identify as such and list changes; otherwise, state plan for documenting important protocol amendments | N/A          |
| Support:                          |         |                                                                                                                                                                                                 |              |
| Sources                           | 5a      | Indicate sources of financial or other support for the review                                                                                                                                   | Page 8       |
| Sponsor                           | 5b      | Provide name for the review funder and/or sponsor                                                                                                                                               | Page 8       |
| Role of sponsor or funder         | 5c      | Describe roles of funder(s), sponsor(s), and/or institution(s), if any, in developing the protocol                                                                                              | Page 8       |
| <b>INTRODUCTION</b>               |         |                                                                                                                                                                                                 |              |
| Rationale                         | 6       | Describe the rationale for the review in the context of what is already known                                                                                                                   | Page 3, 4    |
| Objectives                        | 7       | Provide an explicit statement of the question(s) the review will address with reference to participants, interventions, comparators, and outcomes (PICO)                                        | Page 4       |
| <b>METHODS</b>                    |         |                                                                                                                                                                                                 |              |
| Eligibility                       | 8       | Specify the study characteristics (such as PICO, study design, setting, time frame) and report characteristics (such as years                                                                   | Page 4-6     |

|                                    |     |                                                                                                                                                                                                                                                  |           |
|------------------------------------|-----|--------------------------------------------------------------------------------------------------------------------------------------------------------------------------------------------------------------------------------------------------|-----------|
| criteria                           |     | considered, language, publication status) to be used as criteria for eligibility for the review                                                                                                                                                  |           |
| Information sources                | 9   | Describe all intended information sources (such as electronic databases, contact with study authors, trial registers or other grey literature sources) with planned dates of coverage                                                            | Page 5, 6 |
| Search strategy                    | 10  | Present draft of search strategy to be used for at least one electronic database, including planned limits, such that it could be repeated                                                                                                       | Page 5, 6 |
| Study records:                     |     |                                                                                                                                                                                                                                                  |           |
| Data management                    | 11a | Describe the mechanism(s) that will be used to manage records and data throughout the review                                                                                                                                                     | Page 6    |
| Selection process                  | 11b | State the process that will be used for selecting studies (such as two independent reviewers) through each phase of the review (that is, screening, eligibility and inclusion in meta-analysis)                                                  | Page 6    |
| Data collection process            | 11c | Describe planned method of extracting data from reports (such as piloting forms, done independently, in duplicate), any processes for obtaining and confirming data from investigators                                                           | Page 6    |
| Data items                         | 12  | List and define all variables for which data will be sought (such as PICO items, funding sources), any pre-planned data assumptions and simplifications                                                                                          | Page 6    |
| Outcomes and prioritization        | 13  | List and define all outcomes for which data will be sought, including prioritization of main and additional outcomes, with rationale                                                                                                             | Page 5    |
| Risk of bias in individual studies | 14  | Describe anticipated methods for assessing risk of bias of individual studies, including whether this will be done at the outcome or study level, or both; state how this information will be used in data synthesis                             | Page 6    |
| Data synthesis                     | 15a | Describe criteria under which study data will be quantitatively synthesised                                                                                                                                                                      | Page 6, 7 |
|                                    | 15b | If data are appropriate for quantitative synthesis, describe planned summary measures, methods of handling data and methods of combining data from studies, including any planned exploration of consistency (such as $I^2$ , Kendall's $\tau$ ) | Page 6, 7 |
|                                    | 15c | Describe any proposed additional analyses (such as sensitivity or subgroup analyses, meta-regression)                                                                                                                                            | Page 6, 7 |
|                                    | 15d | If quantitative synthesis is not appropriate, describe the type of summary planned                                                                                                                                                               | Page 6, 7 |
| Meta-bias(es)                      | 16  | Specify any planned assessment of meta-bias(es) (such as publication bias across studies, selective reporting within studies)                                                                                                                    | Page 6    |
| Confidence in cumulative evidence  | 17  | Describe how the strength of the body of evidence will be assessed (such as GRADE)                                                                                                                                                               | Page 7    |

**\* It is strongly recommended that this checklist be read in conjunction with the PRISMA-P Explanation and Elaboration (cite when available) for important clarification on the items. Amendments to a review protocol should be tracked and dated. The copyright for PRISMA-P (including checklist) is held by the PRISMA-P Group and is distributed under a Creative Commons Attribution Licence 4.0.**

From: Shamseer L, Moher D, Clarke M, Ghersi D, Liberati A, Petticrew M, Shekelle P, Stewart L, PRISMA-P Group. Preferred reporting items for systematic review and meta-analysis protocols (PRISMA-P) 2015: elaboration and explanation. *BMJ*. 2015 Jan 2;349(jan02 1):g7647



# BMJ Open

## Functional lesional neurosurgery for tremor – a protocol for a systematic review and meta-analysis

|                                 |                                                                                                                                                                                                                                                                                                                                                                                          |
|---------------------------------|------------------------------------------------------------------------------------------------------------------------------------------------------------------------------------------------------------------------------------------------------------------------------------------------------------------------------------------------------------------------------------------|
| Journal:                        | <i>BMJ Open</i>                                                                                                                                                                                                                                                                                                                                                                          |
| Manuscript ID                   | bmjopen-2016-015409.R1                                                                                                                                                                                                                                                                                                                                                                   |
| Article Type:                   | Protocol                                                                                                                                                                                                                                                                                                                                                                                 |
| Date Submitted by the Author:   | 24-Mar-2017                                                                                                                                                                                                                                                                                                                                                                              |
| Complete List of Authors:       | Schreglmann, Sebastian; University College London, Institute of Neurology<br>Krauss, Joachim; Medizinische Hochschule Hannover, Department of Neurosurgery<br>Chang, Jin Woo; Yonsei University College of Medicine, Department of Neurosurgery<br>Bhatia, Kailash; University College London, Institute of Neurology<br>Kaegi, Georg; Kantonsspital St. Gallen, Department of Neurology |
| <b>Primary Subject Heading</b>: | Neurology                                                                                                                                                                                                                                                                                                                                                                                |
| Secondary Subject Heading:      | Neurology                                                                                                                                                                                                                                                                                                                                                                                |
| Keywords:                       | Adult neurology < NEUROLOGY, Parkinson-s disease < NEUROLOGY, NEUROSURGERY, Neurosurgery < SURGERY                                                                                                                                                                                                                                                                                       |
|                                 |                                                                                                                                                                                                                                                                                                                                                                                          |

SCHOLARONE™  
Manuscripts

1  
2  
3 1 **Functional lesional neurosurgery for tremor – a protocol for a systematic review and meta-analysis**  
4  
5 2

6 3 Sebastian R. Schreglmann, MD <sup>1,2</sup>; Joachim K. Krauss, MD <sup>3</sup>; Jin Woo Chang, MD, PhD <sup>4</sup>; Kailash P. Bhatia,  
7  
8 4 MD, FRCP <sup>1</sup>; Georg Kägi, MD <sup>2</sup>  
9

10 5  
11  
12 6 <sup>1</sup> Sobell Department of Motor Neuroscience and Movement Disorders, Institute of Neurology, UCL, 33 Queen  
13  
14 7 Square, London WC1N 3BG, UK

15 8 <sup>2</sup> Department of Neurology, Kantonsspital St.Gallen, Rorschacher Strasse 95, 9007 St.Gallen, Switzerland

16 9 <sup>3</sup> Department of Neurosurgery, Medizinische Hochschule Hannover, Carl-Neuberg-Strasse 1, 30625 Hannover,  
17  
18 10 Germany

19 11 <sup>4</sup> Department of Neurosurgery, Yonsei University College of Medicine, 205 Seongsanno, Seodaemun-gu Seoul  
20  
21 12 120–752, Republic of Korea  
22  
23  
24  
25  
26  
27  
28  
29  
30  
31

32 16 Corresponding Author:

33 17 Sebastian R. Schreglmann, MD

34 18 Sobell Department of Motor Neuroscience and Movement Disorders

35 19 University College London (UCL)

36 20 Institute of Neurology, London, United Kingdom

37 21 tel: +44(0)20 344 88604

38 22 fax: +44(0)20 344 88642

39 23 email: skgtsrs@ucl.ac.uk  
40  
41  
42  
43  
44  
45  
46  
47  
48  
49

50 26 word count abstract: 295 / 300

51 27 word count text: 2267 / 4000

52 28 running title: tremor neurosurgery

53 29 Funding sources: none  
54  
55  
56  
57  
58  
59  
60

1  
2  
3 32 **Abstract**

4 33 **Introduction:** The recent introduction of incision-less lesional neurosurgery using Gamma knife and MRI-  
5  
6 34 guided focused ultrasound has revived interest in lesional treatment options for tremor disorders. Preliminary  
7  
8 35 literature researches reveal that the consistency of treatment effects after lesional neurosurgery for tremor has not  
9  
10 36 formally been assessed yet. Similarly, the efficacy of different targets for lesional treatment and incidence of  
11  
12 37 persistent side effects of lesional neurosurgical interventions has not been comprehensively assessed. This work  
13  
14 38 therefore aims to describe a suitable process how to review the existing literature on efficacy and persistent side  
15  
16 39 effects of lesional neurosurgical treatment for tremor due to Parkinson's disease (PD), Essential Tremor (ET),  
17  
18 40 Multiple Sclerosis (MS) and midbrain / rubral tremor.

19 41 **Methods and Analysis:** We will search electronic databases (Medline, Cochrane) and reference lists of included  
20  
21 42 articles for studies reporting lesional interventions for tremor in cohorts homogeneous for tremor aetiology and  
22  
23 43 intervention (technique and target). We will include cohorts with a minimum number of five subjects and follow-  
24  
25 44 up of two months. One investigator will perform the initial literature search and two investigators will then  
26  
27 45 independently decide which references to include for final efficacy and safety analysis. After settling of  
28  
29 46 disagreement, data will be extracted from articles using a standardized template. We will perform a random-  
30  
31 47 effect meta-analysis calculating standardized mean differences (Hedge's g) for comparison in Forest plots and  
32  
33 48 subgroup analysis after assessment of heterogeneity using  $I^2$  statistics.

34 49 **Ethics and Dissemination:** This study will summarize the available evidence on the efficacy of lesional  
35  
36 50 interventions for the most frequent tremor disorders, as well as for the incidence rate of persisting side effects  
37  
38 51 after unilateral lesional treatment. This data will be useful to guide future work on incision-less lesional  
39  
40 52 interventions for tremor.

41 53 **Systematic review registration:** This study has been registered with the PROSPERO database (no.  
42  
43 54 CRD42016048049).  
44  
45 55

46  
47 56 **Keywords:** Tremor, Lesional neurosurgery, Thalamotomy, Subthalamotomy, Pallidotomy, Radiofrequency  
48  
49 57 ablation, Focused ultrasound, Gamma knife  
50  
51 58  
52  
53 59  
54  
55 60  
56  
57 61  
58  
59 62  
60

1  
2  
3 63 Strengths and Limitations of this study:

- 4 64 • Protocol for first formal, systematic review and meta-analysis of lesional functional neurosurgery for  
5 tremor  
6 65  
7  
8 66 • Comprehensive comparison of consistency and efficacy of lesional targets in most prevalent tremor  
9 aetiologies  
10 67  
11  
12 68 • First meta-analysis of persistent side effect prevalence after lesional neurosurgical treatment  
13  
14 69 • Protocol to establish safety and efficacy benchmarks for emerging incision-less lesional functional  
15 neurosurgery approaches  
16 70  
17  
18 71 • Frequent retrospective nature and potential reporting bias of primary source data will be addressed  
19  
20 72  
21 73  
22  
23 74  
24  
25 75  
26  
27 76  
28  
29 77  
30  
31 78  
32  
33 79  
34  
35 80  
36  
37 81  
38  
39 82  
40  
41 83  
42  
43 84  
44  
45 85  
46  
47 86  
48  
49 87  
50  
51 88  
52  
53 89  
54  
55 90  
56  
57 91  
58  
59 92  
60 93

1  
2  
3 94 **Main text**  
4  
5 95

6 96 **INTRODUCTION:**  
7

8 97 Tremor is defined as an involuntary, oscillating sinusoidal movement of a body part and is a frequent symptom  
9  
10 98 in Parkinson's disease (PD), Essential Tremor (ET), but also in Multiple Sclerosis (MS) or after midbrain  
11  
12 99 lesions. ET is one of the most common movement disorders affecting up to 4.6% of the population  $\geq 65$  years  
13  
14 100 [1]. While most patients do well with first line oral medication like betablockers or Primidone, at least 50% of  
15  
16 101 them do not tolerate this long term [2], leaving 10% severely disabled by their tremor, losing dexterity to a great  
17  
18 102 extent [3]. Similarly in PD, tremor is one of the most challenging symptoms to treat with oral medication [4] and  
19  
20 103 this group of severely incapacitated patients depends on advanced therapeutic options [5].

21 104 Although its` phenomenology considerably differs between the above mentioned aetiologies, our current  
22  
23 105 understanding points at a common abnormal central oscillatory activity within a network involving motor cortex,  
24  
25 106 thalamus, globus pallidum and cerebellum [6-8]. Accordingly, lesional surgical interventions within parts of this  
26  
27 107 network using functional neurosurgery have been utilized successfully since the 1940ies [9]. Over time,  
28  
29 108 interventions at various anatomical structures within this network have been studied [9-12] and it is now  
30  
31 109 generally accepted that thalamotomy, influencing afferent cerebellar signalling, provides the highest level of  
32  
33 110 tremor symptom relief.  
34

35 111 During the past two decades lesional interventions, although performed world-wide [13], were largely  
36  
37 112 superseded in the academic setting by stimulation technology [14], which contributed dramatically to our  
38  
39 113 understanding of tremor pathoaetiology [15-18]. Since the introduction of Gamma Knife (GK), incision-less  
40  
41 114 functional neurosurgery, i.e. lesion placement through the intact skull, is a possibility [12] and the recent  
42  
43 115 addition of MRI-guided high-intensity focused ultrasound (MRIGFUS) [19-22] has again stimulated interest in  
44  
45 116 this field [23,24].  
46

47 117 A preliminary literature search performed in June 2016 suggests a wealth of studies on this topic, although the  
48  
49 118 majority of published reports are of small or medium size. Obvious heterogeneity in study design, data collection,  
50  
51 119 documentation and presentation limit the accessibility of this data and complicate its` interpretation. So far, there  
52  
53 120 are no reliable estimates on the consistency of treatment effects after lesional interventions for tremor. Similarly,  
54  
55 121 the prevalence of persisting side effects after such interventions has not been compared in a comprehensive way.  
56  
57 122 We therefore aim to summarize the available data on lesional functional surgery for tremor disorders to allow  
58  
59 123 comparisons between aetiologies, treatment targets and techniques. The limitations of earlier reports with  
60

1  
2  
3 124 regards to established and recognized diagnostic criteria, use of validated clinical assessment tools and  
4  
5 125 electrophysiological or imaging-based target verification [10] led us to restrict the literature search to a  
6  
7 126 publication date from 1990 onwards.

8  
9 127 We specifically aim to answer the following questions:

10  
11  
12 128 What is the efficacy of lesional neurosurgical interventions on tremor severity in tremor due to PD, ET, MS and  
13  
14 129 midbrain/rubral origin for different lesioning techniques and targets according to published, peer-reviewed  
15  
16 130 studies?

17  
18  
19 131 What is the prevalence rate of persistent side effects after unilateral lesional interventions for different lesioning  
20  
21 132 technique and target according to published, peer-reviewed studies?

22  
23 133 This will not only allow to objectively assess the safety and efficacy of existing lesional tremor treatment  
24  
25 134 approaches but also to compare novel, incision-less lesional interventions with this benchmark.

26  
27  
28 135

29  
30  
31 136 **METHODS AND ANALYSIS:**

32  
33 137

34 138 **Protocol**

35  
36 139 The methods for this systematic review have been developed according to the recommendations from the  
37  
38 140 Preferred Reporting Items for Systematic Review and Meta-Analysis Protocols (PRISMA-P) 2015 statement  
39  
40 141 [25]. This systematic review protocol has been registered in the International Prospective Register of Systematic  
41  
42 142 reviews (PROSPERO) on September 20<sup>th</sup> 2016: CRD42016048049. A PRISMA-P file is attached (see  
43  
44 143 Additional file 1).

45  
46 144 Eligibility criteria

47  
48  
49 145 Cohorts reporting a minimum of five patients of or above the age of 18 years with a tremor diagnosis of  
50  
51 146 confirmed aetiology, subjected to uni- or bilateral lesional functional neurosurgery in a central neuroanatomical  
52  
53 147 structure (thalamus, pallidum, subthalamic nucleus, alternative subcortical targets) by means of an intracerebral  
54  
55 148 lesion, either by incisional (placement of a stylette, leukotome, cryosurgery or radiofrequency (RF) probe after  
56  
57 149 skull opening) or incision-less (MRIGFUS, GK) means. Cases that received lesional functional neurosurgery in  
58  
59 150 more than one anatomical structure at the same time or non-lesional approaches including deep brain stimulation  
60

1  
2  
3 151 (DBS) will be excluded.  
4

5  
6 152 Outcome Measures:

7  
8 153 As we expect only limited amount of data from controlled trials to be found, this protocol aims to assess  
9  
10 154 intervention effects by comparing pre- and post-interventional states. Primary outcome measure will be the  
11  
12 155 change in upper limb tremor severity from baseline to follow-up time points, as reported on a validated tremor  
13  
14 156 rating scale (United Parkinson's disease rating scale, part III (UPDRS III), clinical rating scale for tremor (CRST  
15  
16 157 [26,27]), Whiget tremor scale etc.). Results from controlled trials comparing lesional interventions to alternative  
17  
18 158 interventions, such as e.g. best medical treatment or deep brain stimulation will be included and discussed in a  
19  
20 159 narrative way as far as meaningful for comparison to lesional interventions. As we expect the literature to be  
21  
22 160 heterogeneous in terms of follow-up duration and applied tremor rating scales we aim to primarily summarize  
23  
24 161 the outcome as standardized mean difference (Hedge's g) [28] irrespective of follow-up duration. To limit bias  
25  
26 162 we will choose the follow-up time-point with the largest number of patients retained in the analysis.  
27  
28 163 Homogeneous cohorts (same tremor aetiology, intervention target and technique) will be grouped together for  
29  
30 164 subgroup-analysis if they consist of a minimum of n=2.

31  
32 165 Secondary outcome measure will be the frequency of reported persistent side-effects after unilateral lesions per  
33  
34 166 indication and intervention group, calculated as % of cases per group. In addition, we aim to calculate the mean  
35  
36 167 rate of dysarthria and gait difficulties reported for unilateral vs. bilateral procedures. Homogeneous cohorts  
37  
38 168 (tremor aetiology, intervention target and technique) will be grouped together for analysis if they consist of a  
39  
40 169 minimum of n=2.

41  
42 170

43  
44 171 Study design:

45  
46 172 The choice of inclusion/exclusion criteria reflects that we expect very few randomized trials in this field.  
47  
48 173 Inclusion: Randomized controlled trials (RCTs), Meta-Analysis, case-control, prospective and retrospective case  
49  
50 174 series. Exclusion: Studies reporting results from mixed aetiologies (subjects of different aetiologies grouped  
51  
52 175 together) or mixed interventions (different anatomical targets grouped together). We will include peer-reviewed  
53  
54 176 articles without language restriction. Letters, abstracts and editorials will not be included (see Table 1).

55  
56 177

57  
58 178 Information sources and search strategy:

59  
60 179 A full search of MEDLINE and Cochrane (ovid) database will be performed limited to time of publication  
180  
181 (between January 1990 and February 2017), using "tremor\*" AND "lesion\*", "neurosurg\*", "thalamotomy",  
"subthalamotomy", "pallidotomy" as search terms. Contact with authors will be made if needed.

182

183

184 Search Strategy:

185

| Item         | Search Term                                                                                                                                                                                                                                        | Boolean operator |
|--------------|----------------------------------------------------------------------------------------------------------------------------------------------------------------------------------------------------------------------------------------------------|------------------|
| Tremor       | ("tremor*" [All Fields] OR "tremor*" [MeSH Terms],<br>"shaking" [All Fields] OR "shaking" [MeSH Terms])                                                                                                                                            | AND              |
| Lesion       | ("lesion*" [All Fields] OR "lesion*" [MeSH Terms],<br>"thalamotomy" [All Fields] OR "thalamotomy"<br>[MeSH Terms], "subthalamotomy" [All Fields] OR<br>"subthalamotomy" [MeSH Terms], "pallidotomy" [All<br>Fields] OR "pallidotomy" [MeSH Terms], | AND              |
| neurosurgery | ("neurosurg*" [All Fields] OR "neurosurg*" [MeSH<br>Terms])                                                                                                                                                                                        | AND              |
| Time-period  | Between 1 <sup>st</sup> January 1990 and 1 <sup>st</sup> February 2017                                                                                                                                                                             |                  |



186 Table 1. Planned In- and Exclusion criteria

|                     | Inclusion criteria                                                                                                                                                                                                                                                                                                                                                                                                                                                                                                | Exclusion criteria                                                                                                                                                                                                           |
|---------------------|-------------------------------------------------------------------------------------------------------------------------------------------------------------------------------------------------------------------------------------------------------------------------------------------------------------------------------------------------------------------------------------------------------------------------------------------------------------------------------------------------------------------|------------------------------------------------------------------------------------------------------------------------------------------------------------------------------------------------------------------------------|
| Population          | <ul style="list-style-type: none"> <li>- Adult patients (&gt;18yrs.) with a tremor diagnosis of confirmed aetiology</li> <li>- uni- or bilateral lesional functional neurosurgical intervention in a central neuroanatomical structure</li> <li>- by incisional (placement of a stylette, leukotome, cryosurgery or radiofrequency probe after skull opening) or incision-less (transcranially focused ultrasound (MRI-guided focused ultrasound (MRIgFUS)), radiation energy (Gamma Knife (GK)) means</li> </ul> | <ul style="list-style-type: none"> <li>- cases subjected to lesional functional neurosurgery in more than one anatomical structure at the same time</li> <li>- or stimulation techniques (deep brain stimulation)</li> </ul> |
| Study design        | <ul style="list-style-type: none"> <li>- randomized controlled trials (RCTs), Meta-Analysis, case-control, prospective and retrospective case series</li> <li>- a minimum of five subjects included per cohort (indication / treatment)</li> <li>- minimum follow-up of 2 months after the intervention</li> </ul>                                                                                                                                                                                                | <ul style="list-style-type: none"> <li>- studies reporting results from mixed aetiologies or mixed intervention (different anatomical targets or techniques)</li> </ul>                                                      |
| Efficacy Outcome    | <ul style="list-style-type: none"> <li>- reporting tremor outcome on a validated tremor scale</li> </ul>                                                                                                                                                                                                                                                                                                                                                                                                          |                                                                                                                                                                                                                              |
| Safety Outcome      | <ul style="list-style-type: none"> <li>- side effects after unilateral only interventions</li> </ul>                                                                                                                                                                                                                                                                                                                                                                                                              | <ul style="list-style-type: none"> <li>- cohorts including bilateral interventions</li> </ul>                                                                                                                                |
| Type of publication | <ul style="list-style-type: none"> <li>- Peer-reviewed articles without language restriction</li> </ul>                                                                                                                                                                                                                                                                                                                                                                                                           | <ul style="list-style-type: none"> <li>- Letters, abstracts and editorials</li> </ul>                                                                                                                                        |

1  
2  
3 187 Data collection:

4 188 Primary database searches will be performed by one researcher who will compile a list of non-duplicate studies  
5  
6 189 according to in- and exclusion criteria. In addition to the primary searches we will identify relevant studies from  
7  
8 190 the reference lists of primary search results. From this list, two researchers will independently compile a  
9  
10 191 definitive list of studies to be included in the safety and efficacy analysis – before analysis, lists will be  
11  
12 192 compared and discrepancies settled. Data will be extracted from original sources by use of a standardized  
13  
14 193 template. As we aim to cover publications from the past 26 years, which might cover interventions dating back  
15  
16 194 to >35 years we deem it unrealistic to compile data on individual participant basis, unless given in publications.

17  
18 195

19 196 Data Items:

- 20  
21 197 1. Publication details: title, authors, publication year  
22  
23 198 2. Design: pro- retrospective, randomization, blind-assessment, controlled;  
24  
25 199 3. Clinical details: cohort size, anatomical target, treatment technique, uni- or bilateral intervention,  
26  
27 200 guidance/targeting technique, tremor scale and item used, pre- and postinterventional tremor score  
28  
29 201 (mean ± standard deviation), follow-up duration, art / number and severity of transient and persistent  
30  
31 202 side-effects reported;

32 203 Quality assessment according to Jadad [29] and Newcastle Ottawa scale[30];  
33  
34 204

35  
36 205 Bias assessment:

37  
38 206 If several follow-up time points are reported per cohort, the time-point with the largest number of subjects  
39  
40 207 retained will be chosen to minimize selection/reporting bias. We will assess the quality of RCTs (Jadad scale  
41  
42 208 [29]) and non-randomized trials (Newcastle-Ottawa Scale [30]) by means of standardized assessment tools and  
43  
44 209 will discuss the limitations of the data synthesis in terms of study and data quality. In addition to that, in the  
45  
46 210 discussion of results - depending on the overall quality of data – we will discuss potential shortcomings of our  
47  
48 211 source data, as retrospective analyses with incomplete follow-up tend to introduce bias.

49 212 A formal assessment of publication bias however only makes sense in the presence of a sufficient number (>10)  
50  
51 213 of homogeneous data sets [31]. As we expect the data compiled in this analysis to be of limited homogeneity we  
52  
53 214 do not plan to formally calculate bias assessments such as by means of Funnel plots, as this can result in  
54  
55 215 misleading results in small and heterogeneous data sets [31]. This shall only be calculated in case subgroups with  
56  
57 216 more than 10 studies included are shown to have no substantial level of heterogeneity ( $I^2 < 50\%$ ).

58 217  
59  
60

1  
2  
3 218 Data synthesis and statistics:  
4  
5 219 Aggregate data on pre-/post-interventional tremor severity will be extracted from publications or calculated from  
6  
7 220 them in the form of mean  $\pm$  standard deviation for outcome variables per indication/intervention group per  
8  
9 221 publication. Data for continuous outcome measures will be used to calculate standardized mean difference  
10  
11 222 (Hedge's  $g$ ) values including 95% confidence intervals [28] and to compute Forest plots using the Meta-  
12  
13 223 Essentials workbook4 toolbox [32]. Based on study heterogeneity we will use a random-effects meta-analysis for  
14  
15 224 quantitative comparison. Heterogeneity between studies will be assessed using  $I^2$  statistics, with an  $I^2 > 50\%$   
16  
17 225 regarded as an indicator of substantial heterogeneity.

18 226 As we will analyse data from different tremor aetiologies and interventions, we will undertake subgroup analyses  
19  
20 227 by the following subgroups: PD tremor: RF ablation ventral intermedial (V.im.) nucleus, RF ablation Globus  
21  
22 228 pallidus internus (GPi), RF ablation subthalamic nucleus (STN), GK ablation V.im.; ET tremor: RF ablation  
23  
24 229 V.im., GK ablation V.im., MRIGFUS ablation V.im. MS tremor: RF ablation V.im., GK ablation V.im. Formal  
25  
26 230 subgroup analysis will be done in case of groups of a minimum of 2 studies per study intervention, target and  
27  
28 231 aetiology. We have not planned to restrict this meta-analysis to particular targeting modalities in order not to  
29  
30 232 fragment results, although we are aware that older modalities, such as ventriculography or CT-based approaches,  
31  
32 233 are not used anymore at least in the western hemisphere academic setting.

33 234 We will provide a narrative synthesis of results structured by aetiological category and intervention type and also  
34  
35 235 discuss the influence of study design and follow-up, taking GRADE guidelines into consideration [33]. We will  
36  
37 236 also discuss tremor recurrence in the narrative section of this review, as we expect only limited data on this in  
38  
39 237 the bulk of reports.

40 238

41 239

#### 42 240 **ETHICS AND DISSEMINATION:**

43  
44  
45 241 The aim of this systematic review and meta-analysis is to summarize the data on consistency and efficacy of  
46  
47 242 lesional functional neurosurgical interventions for the treatment of tremor disorders. The recent development of  
48  
49 243 incision-less lesional functional neurosurgery techniques warrants this careful reassessment of the existing  
50  
51 244 literature to guide future research into lesional interventions. Ethically, we consider it an obligation to  
52  
53 245 summarize this data in a systematic manner to optimize treatment outcome for future patients. It will provide the  
54  
55 246 basis to compare the efficacy of lesional interventions across anatomical targets, tremor aetiologies and lesional  
56  
57 247 techniques. Furthermore, the calculation of prevalence rates of persistent side-effects after unilateral lesional  
58  
59 248 interventions will allow for safety comparisons of established, incisional lesioning techniques and novel  
60

1  
2  
3 249 incision-less procedures, such as MRIGFUS and Gamma knife. This will allow a more unbiased evaluation of the  
4  
5 250 effects of bilateral interventions of the past and possible future.  
6  
7 251 We are committed to publish the results of this study in a peer-reviewed journal to distribute the outcome of this  
8  
9 252 work. To maximise data transparency, we aim to include the data extracted from published sources in our final  
10  
11 253 publication in the form of a table. This protocol, as well as it's registration and publication with the PROSPERO  
12  
13 254 database (no. CRD42016048049) documents our continuing efforts of transparent research.  
14  
15 255  
16 256

17 257 **List of abbreviations:**

18  
19 258 Clinical rating scale for tremor (CRST), deep brain stimulation (DBS), Essential Tremor (ET), Gamma knife  
20  
21 259 (GK), Globus pallidus internus (GPI), MRI-guided high-intensity focused ultrasound (MRIGFUS) Parkinson's  
22  
23 260 disease (PD), Multiple Sclerosis (MS), Preferred Reporting Items for Systematic Review and Meta-Analysis  
24  
25 261 Protocols (PRISMA-P), Randomized controlled trials (RCTs), subthalamic nucleus (STN), United Parkinson's  
26  
27 262 disease rating scale, part III (UPDRS III), ventral intermedial (V.im.) nucleus,  
28  
29 263

30 264 **Declarations:**

31  
32 265 Ethics approval: not applicable  
33  
34 266

35  
36 267 Data sharing statement: not applicable – research protocol only  
37  
38 268

39  
40 269 Competing interest: The authors declare that they have no competing interests.  
41  
42 270

43  
44 271 Funding: This research received no specific grant from any funding agency in the public,  
45  
46 272 commercial or not-for-profit sectors.  
47  
48 273

49 274 Author's contribution: SRS initialized and conceptualised the research plan for the proposed systematic  
50  
51 275 review and wrote the first manuscript draft. KB provided critical input on the proposed methodology and  
52  
53 276 statistical analysis and reviewed the manuscript for important intellectual content. JKK and JWC reviewed the  
54  
55 277 methodology and reviewed the manuscript for important intellectual content. GK supervised the project and  
56  
57 278 corrected the manuscript for important intellectual content. All authors approved of the final version of the  
58  
59 279 manuscript.  
60

1  
2  
3 280

4  
5 281 Acknowledgements: SRS is supported by grants by the Swiss Science Foundation, the Swiss Neurological

6  
7 282 Society and the European Academy of Neurology. We would like to thank Ashwani Jha for many helpful

8  
9 283 discussions on the statistical analysis.  
10  
11  
12  
13  
14  
15  
16  
17  
18  
19  
20  
21  
22  
23  
24  
25  
26  
27  
28  
29  
30  
31  
32  
33  
34  
35  
36  
37  
38  
39  
40  
41  
42  
43  
44  
45  
46  
47  
48  
49  
50  
51  
52  
53  
54  
55  
56  
57  
58  
59  
60

For peer review only

284 **References:**

285

286 1 Louis ED, Ferreira JJ. How common is the most common adult movement disorder? Update on  
 287 the worldwide prevalence of essential tremor. *Mov Disord* 2010;**25**:534–41.  
 288 doi:10.1002/mds.22838

289 2 Lyons KE, Pahwa R. Pharmacotherapy of essential tremor : an overview of existing and  
 290 upcoming agents. *CNS Drugs* 2008;**22**:1037–45. doi:10.2165/0023210-200822120-00006

291 3 Deuschl G, Raethjen J, Hellriegel H, *et al.* Treatment of patients with essential tremor. *The Lancet  
 292 Neurology* 2011;**10**:148–61. doi:10.1016/S1474-4422(10)70322-7

293 4 Speelman JD, Schuurman R, de Bie RMA, *et al.* Stereotactic neurosurgery for tremor. *Mov  
 294 Disord* 2002;**17 Suppl 3**:S84–8. doi:10.1002/mds

295 5 Pahwa R, Lyons KE. Essential tremor: differential diagnosis and current therapy. *Am J Med  
 296* 2003;**115**:134–42. doi:10.1016/S0002-9343(03)00259-6

297 6 Raethjen J, Muthuraman M. Cause or compensation? Complex changes in cerebello-thalamo-  
 298 cortical networks in pathological action tremor. *Brain* 2015;**138**:2808–10.  
 299 doi:10.1093/brain/awv238

300 7 Helmich RC, Janssen MJR, Oyen WJG, *et al.* Pallidal dysfunction drives a cerebellothalamic  
 301 circuit into Parkinson tremor. *Ann Neurol* 2011;**69**:269–81. doi:10.1002/ana.22361

302 8 Cagnan H, Little S, Foltynie T, *et al.* The nature of tremor circuits in parkinsonian and essential  
 303 tremor. *Brain* 2014;**137**:3223–34. doi:10.1093/brain/awu250

304 9 Gildenberg PL, Krauss JK. 4 A-01 History of Stereotactic Surgery. In: *Textbook of stereotactic  
 305 and functional Neurosurgery*. J. Springer 2008. 1–32.

306 10 Guridi J, Lozano AM. A brief history of pallidotomy. *Neurosurgery* 1997;**41**:1169–80–  
 307 discussion1180–3.

308 11 Higuchi Y, Matsuda S, Serizawa T. Gamma knife radiosurgery in movement disorders:  
 309 Indications and limitations. *Mov Disord* 2016;:n/a–n/a. doi:10.1002/mds.26625

310 12 Campbell AM, Glover J, Chiang VLS, *et al.* Gamma knife stereotactic radiosurgical thalamotomy  
 311 for intractable tremor: A systematic review of the literature. *Radiotherapy and Oncology*  
 312 2015;**114**:296–301. doi:10.1016/j.radonc.2015.01.013

313 13 Jourdain VA, Schechtman G. Health economics and surgical treatment for Parkinson's disease in  
 314 a world perspective: results from an international survey. *Stereotact Funct Neurosurg*  
 315 2014;**92**:71–9. doi:10.1159/000355215

316 14 Benabid AL, Chabardes S, Mitrofanis J, *et al.* Deep brain stimulation of the subthalamic nucleus  
 317 for the treatment of Parkinson's disease. *The Lancet Neurology* 2009;**8**:67–81.  
 318 doi:10.1016/S1474-4422(08)70291-6

319 15 Kitagawa M, Murata J, Kikuchi S, *et al.* Deep brain stimulation of subthalamic area for severe  
 320 proximal tremor. *Neurology* 2000;**55**:114–6.

321 16 Herzog J, Hamel W, Wenzelburger R, *et al.* Kinematic analysis of thalamic versus subthalamic  
 322 neurostimulation in postural and intention tremor. *Brain* 2007;**130**:1608–25.  
 323 doi:10.1093/brain/awm077

324 17 Pahwa R, Lyons KE, Wilkinson SB, *et al.* Comparison of thalamotomy to deep brain stimulation  
 325 of the thalamus in essential tremor. *Mov Disord* 2001;**16**:140–3.

- 1  
2  
3 326 18 Cagnan H, Brittain J-S, Little S, *et al.* Phase dependent modulation of tremor amplitude in  
4 327 essential tremor through thalamic stimulation. *Brain* 2013;**136**:3062–75.  
5 328 doi:10.1093/brain/awt239
- 6 329 19 Martin E, Jeanmonod D, Morel A, *et al.* High-intensity focused ultrasound for noninvasive  
7 330 functional neurosurgery. *Ann Neurol* 2009;**66**:858–61. doi:10.1002/ana.21801
- 8  
9 331 20 Lipsman N, Schwartz ML, Huang Y, *et al.* MR-guided focused ultrasound thalamotomy for  
10 332 essential tremor: a proof-of-concept study. *The Lancet Neurology* 2013;**12**:462–8.  
11 333 doi:10.1016/S1474-4422(13)70048-6
- 12  
13 334 21 Elias JW, Huss D, Voss T, *et al.* A pilot study of focused ultrasound thalamotomy for essential  
14 335 tremor. *N Engl J Med* 2013;**369**:640–8. doi:10.1056/NEJMoa1300962
- 15  
16 336 22 Chang WS, Jung HH, Kweon EJ, *et al.* Unilateral magnetic resonance guided focused ultrasound  
17 337 thalamotomy for essential tremor: practices and clinicoradiological outcomes. *J Neurol*  
18 338 *Neurosurg Psychiatr* 2015;**86**:257–64. doi:10.1136/jnnp-2014-307642
- 19  
20 339 23 Hariz M. Focused ultrasound thalamotomy improves essential tremor. *Mov Disord* 2013;**28**:1803.  
21 340 doi:10.1002/mds.25695
- 22  
23 341 24 Deuschl G. New hope for severe essential tremor? *The Lancet Neurology* 2013;**12**:420–2.  
24 342 doi:10.1016/S1474-4422(13)70062-0
- 25  
26 343 25 Shamseer L, Moher D, Clarke M, *et al.* Preferred reporting items for systematic review and meta-  
27 344 analysis protocols (PRISMA-P) 2015: elaboration and explanation. *BMJ* 2015;**349**:g7647.  
28 345 doi:10.1136/bmj.g7647
- 29  
30 346 26 Fahn S, Tolosa E, Marin C. Clinical rating scale for tremor. In: Jankovic J, Tolosa E, eds.  
31 347 *Parkinsons Disease and Movement Disorders*. Munich: 1988. 225–34.
- 32  
33 348 27 Stacy MA, Elble RJ, Ondo WG, *et al.* Assessment of interrater and intrarater reliability of the  
34 349 Fahn-Tolosa-Marin Tremor Rating Scale in essential tremor. *Mov Disord* 2007;**22**:833–8.  
35 350 doi:10.1002/mds.21412
- 36  
37 351 28 Higgins J, Green S, editors. The Cochrane Handbook for Systematic Reviews of Interventions. In:  
38 352 *Cochrane Handbook for Systematic Reviews of Interventions*. 2011. www.handbook.cochrane.org
- 39  
40 353 29 Jadad AR, Moore RA, Carroll D. Assessing the quality of reports of randomized clinical trials: is  
41 354 blinding necessary? *Control Clin Trials* 1996;**17**:1–12.
- 42  
43 355 30 Wells G, Shea B, OConnell D. The Newcastle-Ottawa Scale (NOS) for assessing the quality of  
44 356 nonrandomized studies in meta-analyses. [http://www.ohri.ca/](http://www.ohri.ca/programs/clinical_epidemiology/oxford.asp)  
45 357 [programs/clinical\\_epidemiology/oxford.asp](http://www.ohri.ca/programs/clinical_epidemiology/oxford.asp).
- 46  
47 358 31 Lau J, Ioannidis JPA, Terrin N, *et al.* The case of the misleading funnel plot. *BMJ* 2006;**333**:597–  
48 359 600. doi:10.1136/bmj.333.7568.597
- 49  
50 360 32 van Rhee HJ, Suurmond R, Hak T. User manual for Meta-Essentials: Workbooks for meta-  
51 361 analysis (Version 1.0). [www.erim.eur.nl/research-support/meta-essentials](http://www.erim.eur.nl/research-support/meta-essentials). 2015.
- 52  
53 362 33 Guyatt GH, Oxman AD, Montori V, *et al.* GRADE guidelines: 5. Rating the quality of evidence--  
54 363 publication bias. *J Clin Epidemiol* 2011;**64**:1277–82. doi:10.1016/j.jclinepi.2011.01.011
- 55  
56 364

1  
2  
3  
4  
5  
6  
7  
8  
9  
10  
11  
12  
13  
14  
15  
16  
17  
18  
19  
20  
21  
22  
23  
24  
25  
26  
27  
28  
29  
30  
31  
32  
33  
34  
35  
36  
37  
38  
39  
40  
41  
42  
43  
44  
45  
46  
47  
48  
49

**Supplement to “Functional lesional neurosurgery for tremor - a protocol for a systematic review and meta-analysis” Schreglmann et al.**

**PRISMA-P (Preferred Reporting Items for Systematic review and Meta-Analysis Protocols) 2015 checklist: recommended items to address in a systematic review protocol\***

| Section and topic                 | Item No | Checklist item                                                                                                                                                                                  | Reported     |
|-----------------------------------|---------|-------------------------------------------------------------------------------------------------------------------------------------------------------------------------------------------------|--------------|
| <b>ADMINISTRATIVE INFORMATION</b> |         |                                                                                                                                                                                                 |              |
| Title:                            |         |                                                                                                                                                                                                 |              |
| Identification                    | 1a      | Identify the report as a protocol of a systematic review                                                                                                                                        | Title page   |
| Update                            | 1b      | If the protocol is for an update of a previous systematic review, identify as such                                                                                                              | N/A          |
| Registration                      | 2       | If registered, provide the name of the registry (such as PROSPERO) and registration number                                                                                                      | Page 2 and 4 |
| Authors:                          |         |                                                                                                                                                                                                 |              |
| Contact                           | 3a      | Provide name, institutional affiliation, e-mail address of all protocol authors; provide physical mailing address of corresponding author                                                       | Title page   |
| Contributions                     | 3b      | Describe contributions of protocol authors and identify the guarantor of the review                                                                                                             | Page 8       |
| Amendments                        | 4       | If the protocol represents an amendment of a previously completed or published protocol, identify as such and list changes; otherwise, state plan for documenting important protocol amendments | N/A          |
| Support:                          |         |                                                                                                                                                                                                 |              |
| Sources                           | 5a      | Indicate sources of financial or other support for the review                                                                                                                                   | Page 8       |
| Sponsor                           | 5b      | Provide name for the review funder and/or sponsor                                                                                                                                               | Page 8       |
| Role of sponsor or funder         | 5c      | Describe roles of funder(s), sponsor(s), and/or institution(s), if any, in developing the protocol                                                                                              | Page 8       |
| <b>INTRODUCTION</b>               |         |                                                                                                                                                                                                 |              |
| Rationale                         | 6       | Describe the rationale for the review in the context of what is already known                                                                                                                   | Page 3, 4    |
| Objectives                        | 7       | Provide an explicit statement of the question(s) the review will address with reference to participants, interventions, comparators, and outcomes (PICO)                                        | Page 4       |
| <b>METHODS</b>                    |         |                                                                                                                                                                                                 |              |
| Eligibility                       | 8       | Specify the study characteristics (such as PICO, study design, setting, time frame) and report characteristics (such as years                                                                   | Page 4-6     |



|                                    |     |                                                                                                                                                                                                                                                  |           |
|------------------------------------|-----|--------------------------------------------------------------------------------------------------------------------------------------------------------------------------------------------------------------------------------------------------|-----------|
| criteria                           |     | considered, language, publication status) to be used as criteria for eligibility for the review                                                                                                                                                  |           |
| Information sources                | 9   | Describe all intended information sources (such as electronic databases, contact with study authors, trial registers or other grey literature sources) with planned dates of coverage                                                            | Page 5, 6 |
| Search strategy                    | 10  | Present draft of search strategy to be used for at least one electronic database, including planned limits, such that it could be repeated                                                                                                       | Page 5, 6 |
| Study records:                     |     |                                                                                                                                                                                                                                                  |           |
| Data management                    | 11a | Describe the mechanism(s) that will be used to manage records and data throughout the review                                                                                                                                                     | Page 6    |
| Selection process                  | 11b | State the process that will be used for selecting studies (such as two independent reviewers) through each phase of the review (that is, screening, eligibility and inclusion in meta-analysis)                                                  | Page 6    |
| Data collection process            | 11c | Describe planned method of extracting data from reports (such as piloting forms, done independently, in duplicate), any processes for obtaining and confirming data from investigators                                                           | Page 6    |
| Data items                         | 12  | List and define all variables for which data will be sought (such as PICO items, funding sources), any pre-planned data assumptions and simplifications                                                                                          | Page 6    |
| Outcomes and prioritization        | 13  | List and define all outcomes for which data will be sought, including prioritization of main and additional outcomes, with rationale                                                                                                             | Page 5    |
| Risk of bias in individual studies | 14  | Describe anticipated methods for assessing risk of bias of individual studies, including whether this will be done at the outcome or study level, or both; state how this information will be used in data synthesis                             | Page 6    |
| Data synthesis                     | 15a | Describe criteria under which study data will be quantitatively synthesised                                                                                                                                                                      | Page 6, 7 |
|                                    | 15b | If data are appropriate for quantitative synthesis, describe planned summary measures, methods of handling data and methods of combining data from studies, including any planned exploration of consistency (such as $I^2$ , Kendall's $\tau$ ) | Page 6, 7 |
|                                    | 15c | Describe any proposed additional analyses (such as sensitivity or subgroup analyses, meta-regression)                                                                                                                                            | Page 6, 7 |
|                                    | 15d | If quantitative synthesis is not appropriate, describe the type of summary planned                                                                                                                                                               | Page 6, 7 |
| Meta-bias(es)                      | 16  | Specify any planned assessment of meta-bias(es) (such as publication bias across studies, selective reporting within studies)                                                                                                                    | Page 6    |
| Confidence in cumulative evidence  | 17  | Describe how the strength of the body of evidence will be assessed (such as GRADE)                                                                                                                                                               | Page 7    |

**\* It is strongly recommended that this checklist be read in conjunction with the PRISMA-P Explanation and Elaboration (cite when available) for important clarification on the items. Amendments to a review protocol should be tracked and dated. The copyright for PRISMA-P (including checklist) is held by the PRISMA-P Group and is distributed under a Creative Commons Attribution Licence 4.0.**

*From: Shamseer L, Moher D, Clarke M, Ghersi D, Liberati A, Petticrew M, Shekelle P, Stewart L, PRISMA-P Group. Preferred reporting items for systematic review and meta-analysis protocols (PRISMA-P) 2015: elaboration and explanation. BMJ. 2015 Jan 2;349(jan02 1):g7647*
